# Supplementary material for: Blastomyces gilchristii as Cause of Fatal Acute Respiratory Distress Syndrome
Source: PubMed Central journal article supplement (PMC4734522; doi:10.3201/eid2202.151183), 2016-02
Supplement: 15-1183-Techapp-s1.pdf [file 15-1183-Techapp-s1.pdf]

# Blastomyces gilchristii as Cause of Fatal Acute Respiratory Distress Syndrome

## Technical Appendix

| Strains                |                          | 1                  | 19             | 50             |
|------------------------|--------------------------|--------------------|----------------|----------------|
| <i>B. gilchristii</i>  | TB00029   JN562140       | GAAATGCGATAAGTAATG | <b>C</b>       | GAATTGCAGAATTC |
|                        | TB00037   JN562142       | GAAATGCGATAAGTAATG | <b>C</b>       | GAATTGCAGAATTC |
|                        | Strain 241   JN562106    | GAAATGCGATAAGTAATG | <b>C</b>       | GAATTGCAGAATTC |
|                        | ATCC 66136   JN562118    | GAAATGCGATAAGTAATG | <b>C</b>       | GAATTGCAGAATTC |
|                        | ATCC 62583   JN562117    | GAAATGCGATAAGTAATG | <b>C</b>       | GAATTGCAGAATTC |
|                        | ATCC 62541   JN562116    | GAAATGCGATAAGTAATG | <b>C</b>       | GAATTGCAGAATTC |
|                        | ATCC 60637   JN562115    | GAAATGCGATAAGTAATG | <b>C</b>       | GAATTGCAGAATTC |
|                        | ATCC 60636   JN562114    | GAAATGCGATAAGTAATG | <b>C</b>       | GAATTGCAGAATTC |
|                        | ATCC-MYA-2585   JN562119 | GAAATGCGATAAGTAATG | <b>C</b>       | GAATTGCAGAATTC |
|                        | <u>13BL347</u>           | GAAATGCGATAAGTAATG | <b>T</b>       | GAATTGCAGAATTC |
| <i>B. dermatitidis</i> | ATCC-MYA-2586   JN562161 | GAAATGCGATAAGTAATG | <b>T</b>       | GAATTGCAGAATTC |
|                        | ATCC 26197   JN562158    | GAAATGCGATAAGTAATG | <b>T</b>       | GAATTGCAGAATTC |
|                        | ATCC 26199   JN562159    | GAAATGCGATAAGTAATG | <b>T</b>       | GAATTGCAGAATTC |
|                        | ATCC 28306   JN562159    | GAAATGCGATAAGTAATG | <b>T</b>       | GAATTGCAGAATTC |
|                        | UAMH 5635   JN562183     | GAAATGCGATAAGTAATG | <b>T</b>       | GAATTGCAGAATTC |
|                        | TB00014   JN562146       | GAAATGCGATAAGTAATG | <b>T</b>       | GAATTGCAGAATTC |
| TB00042   JN562148     | GAAATGCGATAAGTAATG       | <b>T</b>           | GAATTGCAGAATTC |                |
|                        |                          | *****              |                |                |

**Technical Appendix Figure.** Clustal alignment of sequenced region of internal transcribed spacer 2 (ITS2) of *Blastomyces dermatitidis* and *B. gilchristii*. The ITS2 sequence of isolate 13BL347 was aligned to the ITS2 sequences of several well-characterized representatives of *B. dermatitidis* and *B. gilchristii* sequences (1,2), using the multiple sequence alignment tool, Clustal Omega (<http://www.ebi.ac.uk/tools/msa/clustalo>) using default settings (3). The single nucleotide polymorphism in ITS2 at position 19 is used for differentiation of *B. dermatitidis* from *B. gilchristii* (2). The sequence of 13BL347 ITS2 (underlined) possessed a cytosine at position 19 (bolded white text), which is diagnostic for *B. gilchristii*, while thymine (bolded black text) at that position is conserved in *B. dermatitidis*. Strains included in the alignment were *B. dermatitidis* strains ATCC MYA-2586 (JN562161), ATCC 26197 (JN562158), ATCC 26199 (JN562159), ATCC 28306 (JN562159), UAMH 5635 (JN562183), TB00014 (JN562146), TB00042 (JN562148) (2) and alpacaN13BD13\_0325 (KF543873) (1) and *B. gilchristii* strains ATCC MYA-2585 (JN562119), ATCC 60636 (JN562114), ATCC 60637 (JN562115), ATCC 62541 (JN562116), ATCC 62583 (JN562117), ATCC 66136 (JN562118), strain 241 (JN562106), TB0029 (JN562140), TB0037 (JN562142) (2). With the exception of KF543873, these strains were previously identified to species level by Brown et al. (2) through multilocus sequence typing scheme using *chs2*, *drk1*, *fads*, *pyrF*, *tub1*, *arf6*, and ITS2. \*Denotes a conserved nucleotide among strains in alignment.

## References

1. Meece JK, Anderson JL, Gruszka S, Sloss BL, Sullivan B, Reed KD. Variation in clinical phenotype of human infection among genetic groups of *Blastomyces dermatitidis*. J Infect Dis. 2013;207:814–22. [PubMed http://dx.doi.org/10.1093/infdis/jis756](http://dx.doi.org/10.1093/infdis/jis756)
2. Brown EM, McTaggart LR, Zhang SX, Low DE, Stevens DA, Richardson SE. Phylogenetic analysis reveals a cryptic species *Blastomyces gilchristii*, sp. nov. within the human pathogenic fungus *Blastomyces dermatitidis*. PLoS One. 2013;8:e59237. [PubMed http://dx.doi.org/10.1371/journal.pone.0059237](http://dx.doi.org/10.1371/journal.pone.0059237)
3. Sievers F, Wilm A, Dineen D, Gibson TJ, Karplus K, Li W, et al. Fast, scalable generation of high-quality protein multiple sequence alignments using Clustal Omega. Mol Syst Biol. 2011;7:539. [PubMed http://dx.doi.org/10.1038/msb.2011.75](http://dx.doi.org/10.1038/msb.2011.75)
